# Supplementary material
Source: Springer Nature journal article supplement (https://www.springerprofessional.de/resource/supplementary/40294_2012_21_MOESM10_ESM.pdf/11899520)

--- Settlement-free peering link  
→ Transit link customer to provider

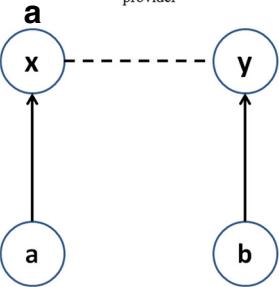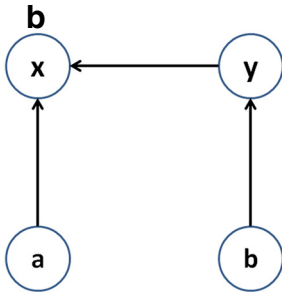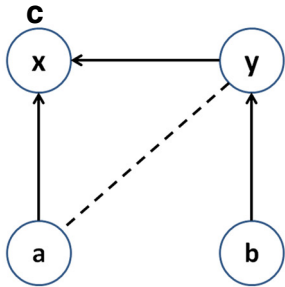

Supplement: MOESM10 [file 11899520]
